# Supplementary material
Source: Elsevier journal article supplement (https://www.sciencedirect.com/science/article/pii/S2530064420300171)
Supplement: mmc2 [file S2530064420300171:mmc2.xlsx]

## Sheet: Sheet1
species	lon	lat
Rhipicephalus sanguineus	34.78	23.4
Rhipicephalus sanguineus	32.88	24.08
Rhipicephalus sanguineus	-8.13	27.67
Rhipicephalus sanguineus	29.25	28.1
Rhipicephalus sanguineus	-9.87	28.48
Rhipicephalus sanguineus	-10.67	28.5
Rhipicephalus sanguineus	33.97	28.55
Rhipicephalus sanguineus	-9.42	28.6
Rhipicephalus sanguineus	33.62	28.7
Rhipicephalus sanguineus	-10.05	28.98
Rhipicephalus sanguineus	31.08	29.08
Rhipicephalus sanguineus	31.08	29.25
Rhipicephalus sanguineus	31.2	30
Rhipicephalus sanguineus	30.75	30.05
Rhipicephalus sanguineus	-2.17	30.13
Rhipicephalus sanguineus	-8.22	30.17
Rhipicephalus sanguineus	-9.37	30.28
Rhipicephalus sanguineus	-9.6	30.37
Rhipicephalus sanguineus	-6	30.42
Rhipicephalus sanguineus	-9.6	30.43
Rhipicephalus sanguineus	31.02	30.52
Rhipicephalus sanguineus	31.03	30.53
Rhipicephalus sanguineus	31.02	30.55
Rhipicephalus sanguineus	-8.13	31.05
Rhipicephalus sanguineus	29.9	31.2
Rhipicephalus sanguineus	16.59	31.21
Rhipicephalus sanguineus	-9.77	31.51
Rhipicephalus sanguineus	-8	31.63
Rhipicephalus sanguineus	20.02	31.67
Rhipicephalus sanguineus	20.42	31.9
Rhipicephalus sanguineus	12.02	31.95
Rhipicephalus sanguineus	-7.4	32.05
Rhipicephalus sanguineus	20.27	32.08
Rhipicephalus sanguineus	-7.75	32.17
Rhipicephalus sanguineus	-6.35	32.17
Rhipicephalus sanguineus	15.09	32.38
Rhipicephalus sanguineus	-6.02	32.43
Rhipicephalus sanguineus	10.45	32.93
Rhipicephalus sanguineus	-7.5	33
Rhipicephalus sanguineus	-7.62	33
Rhipicephalus sanguineus	-5.83	33.15
Rhipicephalus sanguineus	-6.88	33.22
Rhipicephalus sanguineus	-5.42	33.37
Rhipicephalus sanguineus	-5.2	33.42
Rhipicephalus sanguineus	-6.02	33.43
Rhipicephalus sanguineus	-6.15	33.48
Rhipicephalus sanguineus	9.97	33.55
Rhipicephalus sanguineus	8.03	33.55
Rhipicephalus sanguineus	-6.88	33.57
Rhipicephalus sanguineus	1	33.68
Rhipicephalus sanguineus	8.97	33.7
Rhipicephalus sanguineus	-7.35	33.72
Rhipicephalus sanguineus	-7.33	33.72
Rhipicephalus sanguineus	1.53	33.73
Rhipicephalus sanguineus	1.22	33.75
Rhipicephalus sanguineus	10.03	33.87
Rhipicephalus sanguineus	10.12	33.88
Rhipicephalus sanguineus	-5.55	33.9
Rhipicephalus sanguineus	8.13	33.92
Rhipicephalus sanguineus	-6.92	33.93
Rhipicephalus sanguineus	9.63	33.95
Rhipicephalus sanguineus	-5.1	33.97
Rhipicephalus sanguineus	8	34
Rhipicephalus sanguineus	0.08	34.03
Rhipicephalus sanguineus	-6.37	34.1
Rhipicephalus sanguineus	-6.6	34.27
Rhipicephalus sanguineus	7.93	34.32
Rhipicephalus sanguineus	8.4	34.33
Rhipicephalus sanguineus	8.78	34.42
Rhipicephalus sanguineus	9.57	34.58
Rhipicephalus sanguineus	-4.92	34.63
Rhipicephalus sanguineus	32.97	34.66
Rhipicephalus sanguineus	-0.62	34.67
Rhipicephalus sanguineus	10.68	34.72
Rhipicephalus sanguineus	32.57	34.73
Rhipicephalus sanguineus	-4.83	34.73
Rhipicephalus sanguineus	32.69	34.78
Rhipicephalus sanguineus	4.27	34.85
Rhipicephalus sanguineus	-6.25	34.9
Rhipicephalus sanguineus	-5.27	34.93
Rhipicephalus sanguineus	33.42	34.95
Rhipicephalus sanguineus	32.72	34.97
Rhipicephalus sanguineus	33.09	35.1
Rhipicephalus sanguineus	33.36	35.17
Rhipicephalus sanguineus	5.88	35.37
Rhipicephalus sanguineus	10.05	35.37
Rhipicephalus sanguineus	0.13	35.38
Rhipicephalus sanguineus	-0.83	35.45
Rhipicephalus sanguineus	-6.3	35.47
Rhipicephalus sanguineus	0.73	35.56
Rhipicephalus sanguineus	6.63	35.65
Rhipicephalus sanguineus	1.45	35.65
Rhipicephalus sanguineus	5.65	35.67
Rhipicephalus sanguineus	10.1	35.67
Rhipicephalus sanguineus	-0.63	35.68
Rhipicephalus sanguineus	2.02	35.87
Rhipicephalus sanguineus	10.02	35.93
Rhipicephalus sanguineus	0.08	35.93
Rhipicephalus sanguineus	9.37	36.08
Rhipicephalus sanguineus	3.68	36.15
Rhipicephalus sanguineus	1.33	36.15
Rhipicephalus sanguineus	8.7	36.17
Rhipicephalus sanguineus	5.4	36.18
Rhipicephalus sanguineus	5.27	36.2
Rhipicephalus sanguineus	3.83	36.37
Rhipicephalus sanguineus	8.33	36.38
Rhipicephalus sanguineus	4.03	36.43
Rhipicephalus sanguineus	7.27	36.45
Rhipicephalus sanguineus	3.02	36.46
Rhipicephalus sanguineus	8.18	36.46
Rhipicephalus sanguineus	2.8	36.47
Rhipicephalus sanguineus	3.58	36.55
Rhipicephalus sanguineus	2.9	36.57
Rhipicephalus sanguineus	4.3	36.57
Rhipicephalus sanguineus	3	36.6
Rhipicephalus sanguineus	-4.5	36.62
Rhipicephalus sanguineus	-6.13	36.68
Rhipicephalus sanguineus	10.17	36.68
Rhipicephalus sanguineus	10.5	36.7
Rhipicephalus sanguineus	9.52	36.7
Rhipicephalus sanguineus	5.97	36.77
Rhipicephalus sanguineus	9.08	36.77
Rhipicephalus sanguineus	10.98	36.77
Rhipicephalus sanguineus	2.95	36.78
Rhipicephalus sanguineus	10.17	36.8
Rhipicephalus sanguineus	10.3	36.82
Rhipicephalus sanguineus	-2.45	36.83
Rhipicephalus sanguineus	10.32	36.85
Rhipicephalus sanguineus	-3.58	36.85
Rhipicephalus sanguineus	9.22	36.88
Rhipicephalus sanguineus	10.03	36.9
Rhipicephalus sanguineus	10.67	36.92
Rhipicephalus sanguineus	-3.43	36.93
Rhipicephalus sanguineus	10.05	36.95
Rhipicephalus sanguineus	22.05	37.08
Rhipicephalus sanguineus	-8.92	37.08
Rhipicephalus sanguineus	-8.88	37.08
Rhipicephalus sanguineus	-6.42	37.08
Rhipicephalus sanguineus	-3.65	37.12
Rhipicephalus sanguineus	-8.78	37.13
Rhipicephalus sanguineus	-3.53	37.13
Rhipicephalus sanguineus	-8.73	37.15
Rhipicephalus sanguineus	-8.65	37.15
Rhipicephalus sanguineus	-3.57	37.15
Rhipicephalus sanguineus	-3.43	37.15
Rhipicephalus sanguineus	10.03	37.17
Rhipicephalus sanguineus	-3.6	37.18
Rhipicephalus sanguineus	13.77	37.18
Rhipicephalus sanguineus	-7.42	37.2
Rhipicephalus sanguineus	-4.02	37.22
Rhipicephalus sanguineus	9.22	37.22
Rhipicephalus sanguineus	-8.05	37.23
Rhipicephalus sanguineus	9.8	37.25
Rhipicephalus sanguineus	-3.53	37.25
Rhipicephalus sanguineus	29.76	37.29
Rhipicephalus sanguineus	13.57	37.32
Rhipicephalus sanguineus	-8.55	37.32
Rhipicephalus sanguineus	-2.97	37.37
Rhipicephalus sanguineus	25.27	37.38
Rhipicephalus sanguineus	-3.52	37.38
Rhipicephalus sanguineus	-6	37.38
Rhipicephalus sanguineus	14.7	37.38
Rhipicephalus sanguineus	29.88	37.39
Rhipicephalus sanguineus	22.13	37.4
Rhipicephalus sanguineus	-7.47	37.47
Rhipicephalus sanguineus	30	37.5
Rhipicephalus sanguineus	-8.5	37.5
Rhipicephalus sanguineus	30.28	37.55
Rhipicephalus sanguineus	30.07	37.56
Rhipicephalus sanguineus	14.27	37.57
Rhipicephalus sanguineus	30.45	37.59
Rhipicephalus sanguineus	13.25	37.62
Rhipicephalus sanguineus	13.48	37.63
Rhipicephalus sanguineus	-7.67	37.63
Rhipicephalus sanguineus	30.33	37.64
Rhipicephalus sanguineus	-5.98	37.67
Rhipicephalus sanguineus	29.85	37.68
Rhipicephalus sanguineus	13.02	37.68
Rhipicephalus sanguineus	30.35	37.7
Rhipicephalus sanguineus	-5.35	37.72
Rhipicephalus sanguineus	30.29	37.72
Rhipicephalus sanguineus	14.1	37.78
Rhipicephalus sanguineus	12.43	37.8
Rhipicephalus sanguineus	13.57	37.82
Rhipicephalus sanguineus	13.72	37.82
Rhipicephalus sanguineus	13.85	37.82
Rhipicephalus sanguineus	14	37.82
Rhipicephalus sanguineus	12.67	37.83
Rhipicephalus sanguineus	13.77	37.85
Rhipicephalus sanguineus	13.97	37.87
Rhipicephalus sanguineus	-3.22	37.9
Rhipicephalus sanguineus	13.53	37.92
Rhipicephalus sanguineus	-8.73	37.92
Rhipicephalus sanguineus	23.68	37.93
Rhipicephalus sanguineus	-7.78	37.93
Rhipicephalus sanguineus	13.67	37.93
Rhipicephalus sanguineus	12.97	37.98
Rhipicephalus sanguineus	12.55	37.98
Rhipicephalus sanguineus	-8.3	38
Rhipicephalus sanguineus	12.88	38.02
Rhipicephalus sanguineus	-3.37	38.02
Rhipicephalus sanguineus	-8.28	38.03
Rhipicephalus sanguineus	13.37	38.12
Rhipicephalus sanguineus	-3.08	38.12
Rhipicephalus sanguineus	13.18	38.13
Rhipicephalus sanguineus	15.92	38.17
Rhipicephalus sanguineus	-8.57	38.17
Rhipicephalus sanguineus	-8.58	38.17
Rhipicephalus sanguineus	35.8	38.17
Rhipicephalus sanguineus	16.17	38.18
Rhipicephalus sanguineus	16.2	38.22
Rhipicephalus sanguineus	-7.53	38.22
Rhipicephalus sanguineus	35.14	38.24
Rhipicephalus sanguineus	20.58	38.25
Rhipicephalus sanguineus	-3.62	38.25
Rhipicephalus sanguineus	-8.22	38.28
Rhipicephalus sanguineus	43.1	38.3
Rhipicephalus sanguineus	16.08	38.32
Rhipicephalus sanguineus	-8.53	38.35
Rhipicephalus sanguineus	-8.5	38.37
Rhipicephalus sanguineus	16.4	38.38
Rhipicephalus sanguineus	-8.43	38.38
Rhipicephalus sanguineus	-8.42	38.38
Rhipicephalus sanguineus	-8.43	38.4
Rhipicephalus sanguineus	-8.4	38.4
Rhipicephalus sanguineus	-8.33	38.4
Rhipicephalus sanguineus	22.88	38.43
Rhipicephalus sanguineus	39.31	38.45
Rhipicephalus sanguineus	43.5	38.5
Rhipicephalus sanguineus	-8.65	38.5
Rhipicephalus sanguineus	35.33	38.51
Rhipicephalus sanguineus	-8.9	38.53
Rhipicephalus sanguineus	-8.72	38.55
Rhipicephalus sanguineus	43.25	38.57
Rhipicephalus sanguineus	-8.93	38.57
Rhipicephalus sanguineus	-8.67	38.57
Rhipicephalus sanguineus	38.82	38.57
Rhipicephalus sanguineus	-8.7	38.58
Rhipicephalus sanguineus	-8.67	38.58
Rhipicephalus sanguineus	-9.08	38.62
Rhipicephalus sanguineus	-8.65	38.62
Rhipicephalus sanguineus	-9.12	38.62
Rhipicephalus sanguineus	-8.7	38.62
Rhipicephalus sanguineus	39.27	38.62
Rhipicephalus sanguineus	-9.1	38.63
Rhipicephalus sanguineus	-8.92	38.63
Rhipicephalus sanguineus	-9.15	38.63
Rhipicephalus sanguineus	-8.93	38.63
Rhipicephalus sanguineus	-8.98	38.65
Rhipicephalus sanguineus	-8.22	38.65
Rhipicephalus sanguineus	-9.07	38.67
Rhipicephalus sanguineus	-9.23	38.67
Rhipicephalus sanguineus	39.22	38.68
Rhipicephalus sanguineus	39.93	38.69
Rhipicephalus sanguineus	13.18	38.7
Rhipicephalus sanguineus	43.32	38.72
Rhipicephalus sanguineus	38.98	38.77
Rhipicephalus sanguineus	-8.92	38.8
Rhipicephalus sanguineus	-8.4	38.87
Rhipicephalus sanguineus	-6.68	38.87
Rhipicephalus sanguineus	-6.33	38.92
Rhipicephalus sanguineus	-8.87	38.93
Rhipicephalus sanguineus	-9.2	38.97
Rhipicephalus sanguineus	-5.5	39.03
Rhipicephalus sanguineus	-6.9	39.05
Rhipicephalus sanguineus	-9.32	39.08
Rhipicephalus sanguineus	8.78	39.08
Rhipicephalus sanguineus	26.55	39.1
Rhipicephalus sanguineus	9.12	39.22
Rhipicephalus sanguineus	35.98	39.23
Rhipicephalus sanguineus	-8.68	39.23
Rhipicephalus sanguineus	-6.12	39.27
Rhipicephalus sanguineus	-8	39.32
Rhipicephalus sanguineus	-6.47	39.32
Rhipicephalus sanguineus	-5.48	39.33
Rhipicephalus sanguineus	-5.85	39.33
Rhipicephalus sanguineus	22.95	39.37
Rhipicephalus sanguineus	-6.37	39.37
Rhipicephalus sanguineus	-6.83	39.38
Rhipicephalus sanguineus	-5.38	39.38
Rhipicephalus sanguineus	16.28	39.4
Rhipicephalus sanguineus	-7.38	39.42
Rhipicephalus sanguineus	-5.62	39.42
Rhipicephalus sanguineus	-5.77	39.43
Rhipicephalus sanguineus	-5.45	39.43
Rhipicephalus sanguineus	-6.65	39.43
Rhipicephalus sanguineus	16.28	39.45
Rhipicephalus sanguineus	-5.13	39.47
Rhipicephalus sanguineus	-6.38	39.47
Rhipicephalus sanguineus	-5.32	39.47
Rhipicephalus sanguineus	-6.37	39.48
Rhipicephalus sanguineus	16.28	39.52
Rhipicephalus sanguineus	20.55	39.52
Rhipicephalus sanguineus	16.12	39.55
Rhipicephalus sanguineus	-6.42	39.58
Rhipicephalus sanguineus	16.05	39.6
Rhipicephalus sanguineus	-6.37	39.6
Rhipicephalus sanguineus	-5.23	39.6
Rhipicephalus sanguineus	-7.25	39.6
Rhipicephalus sanguineus	-6.65	39.62
Rhipicephalus sanguineus	37.21	39.62
Rhipicephalus sanguineus	22.42	39.63
Rhipicephalus sanguineus	35.74	39.65
Rhipicephalus sanguineus	32.8	39.66
Rhipicephalus sanguineus	33.08	39.66
Rhipicephalus sanguineus	37.12	39.67
Rhipicephalus sanguineus	32.83	39.69
Rhipicephalus sanguineus	32.83	39.74
Rhipicephalus sanguineus	16.45	39.75
Rhipicephalus sanguineus	21.18	39.77
Rhipicephalus sanguineus	19.77	39.78
Rhipicephalus sanguineus	20.03	39.78
Rhipicephalus sanguineus	32.29	39.79
Rhipicephalus sanguineus	32.28	39.82
Rhipicephalus sanguineus	32.24	39.84
Rhipicephalus sanguineus	33.22	39.86
Rhipicephalus sanguineus	32.08	39.87
Rhipicephalus sanguineus	18.33	39.88
Rhipicephalus sanguineus	-5.68	39.88
Rhipicephalus sanguineus	-6.95	39.88
Rhipicephalus sanguineus	19.95	39.92
Rhipicephalus sanguineus	-8.68	39.93
Rhipicephalus sanguineus	18.37	39.93
Rhipicephalus sanguineus	-6.02	39.95
Rhipicephalus sanguineus	38.71	39.96
Rhipicephalus sanguineus	33.33	39.96
Rhipicephalus sanguineus	-8.47	39.97
Rhipicephalus sanguineus	32.62	39.97
Rhipicephalus sanguineus	38.74	39.99
Rhipicephalus sanguineus	34.62	40.02
Rhipicephalus sanguineus	-6.08	40.03
Rhipicephalus sanguineus	23.42	40.05
Rhipicephalus sanguineus	18.38	40.05
Rhipicephalus sanguineus	33.12	40.06
Rhipicephalus sanguineus	-5.75	40.07
Rhipicephalus sanguineus	33.09	40.08
Rhipicephalus sanguineus	21.42	40.08
Rhipicephalus sanguineus	36.47	40.09
Rhipicephalus sanguineus	36.51	40.11
Rhipicephalus sanguineus	-5.77	40.12
Rhipicephalus sanguineus	-5.6	40.12
Rhipicephalus sanguineus	18.3	40.12
Rhipicephalus sanguineus	32.62	40.12
Rhipicephalus sanguineus	32.56	40.13
Rhipicephalus sanguineus	32.99	40.14
Rhipicephalus sanguineus	-5.9	40.15
Rhipicephalus sanguineus	16.43	40.17
Rhipicephalus sanguineus	18.03	40.18
Rhipicephalus sanguineus	-5.82	40.18
Rhipicephalus sanguineus	-5.8	40.2
Rhipicephalus sanguineus	9.35	40.2
Rhipicephalus sanguineus	16.68	40.22
Rhipicephalus sanguineus	23.26	40.22
Rhipicephalus sanguineus	35.76	40.23
Rhipicephalus sanguineus	20.47	40.23
Rhipicephalus sanguineus	16.7	40.25
Rhipicephalus sanguineus	22.33	40.25
Rhipicephalus sanguineus	23.27	40.27
Rhipicephalus sanguineus	18.3	40.28
Rhipicephalus sanguineus	23.2	40.3
Rhipicephalus sanguineus	16.43	40.32
Rhipicephalus sanguineus	22.58	40.32
Rhipicephalus sanguineus	37.31	40.32
Rhipicephalus sanguineus	19.55	40.33
Rhipicephalus sanguineus	17.72	40.35
Rhipicephalus sanguineus	16.8	40.37
Rhipicephalus sanguineus	8.5	40.37
Rhipicephalus sanguineus	23.2	40.37
Rhipicephalus sanguineus	32.61	40.37
Rhipicephalus sanguineus	35.18	40.38
Rhipicephalus sanguineus	18.18	40.38
Rhipicephalus sanguineus	23.45	40.38
Rhipicephalus sanguineus	21.32	40.38
Rhipicephalus sanguineus	16.68	40.4
Rhipicephalus sanguineus	16.23	40.4
Rhipicephalus sanguineus	22.47	40.42
Rhipicephalus sanguineus	25.5	40.47
Rhipicephalus sanguineus	23.28	40.47
Rhipicephalus sanguineus	23.18	40.47
Rhipicephalus sanguineus	16.15	40.48
Rhipicephalus sanguineus	16.45	40.48
Rhipicephalus sanguineus	16.25	40.48
Rhipicephalus sanguineus	-7.3	40.5
Rhipicephalus sanguineus	19.57	40.5
Rhipicephalus sanguineus	17.7	40.51
Rhipicephalus sanguineus	23.05	40.53
Rhipicephalus sanguineus	17.58	40.53
Rhipicephalus sanguineus	-2.82	40.53
Rhipicephalus sanguineus	-7.27	40.53
Rhipicephalus sanguineus	16.67	40.55
Rhipicephalus sanguineus	16.5	40.57
Rhipicephalus sanguineus	22.58	40.57
Rhipicephalus sanguineus	17.1	40.58
Rhipicephalus sanguineus	17.47	40.58
Rhipicephalus sanguineus	9.25	40.58
Rhipicephalus sanguineus	16.8	40.62
Rhipicephalus sanguineus	22.68	40.62
Rhipicephalus sanguineus	22.73	40.63
Rhipicephalus sanguineus	17.93	40.63
Rhipicephalus sanguineus	16.93	40.63
Rhipicephalus sanguineus	23.17	40.63
Rhipicephalus sanguineus	15.8	40.63
Rhipicephalus sanguineus	23.48	40.65
Rhipicephalus sanguineus	17.52	40.65
Rhipicephalus sanguineus	16.6	40.67
Rhipicephalus sanguineus	17.65	40.7
Rhipicephalus sanguineus	17.75	40.7
Rhipicephalus sanguineus	8.55	40.72
Rhipicephalus sanguineus	26.08	40.72
Rhipicephalus sanguineus	22.33	40.75
Rhipicephalus sanguineus	22.63	40.75
Rhipicephalus sanguineus	16.23	40.75
Rhipicephalus sanguineus	17.27	40.78
Rhipicephalus sanguineus	20.7	40.78
Rhipicephalus sanguineus	16.92	40.8
Rhipicephalus sanguineus	17.12	40.8
Rhipicephalus sanguineus	16.75	40.8
Rhipicephalus sanguineus	0.52	40.8
Rhipicephalus sanguineus	0.5	40.82
Rhipicephalus sanguineus	16.55	40.82
Rhipicephalus sanguineus	17.37	40.83
Rhipicephalus sanguineus	22.5	40.85
Rhipicephalus sanguineus	17.12	40.85
Rhipicephalus sanguineus	16.7	40.87
Rhipicephalus sanguineus	0.37	40.87
Rhipicephalus sanguineus	17.17	40.88
Rhipicephalus sanguineus	16.93	40.88
Rhipicephalus sanguineus	24.7	40.9
Rhipicephalus sanguineus	22.78	40.9
Rhipicephalus sanguineus	14.78	40.9
Rhipicephalus sanguineus	26.38	40.92
Rhipicephalus sanguineus	16.92	40.95
Rhipicephalus sanguineus	17.3	40.95
Rhipicephalus sanguineus	17.12	40.97
Rhipicephalus sanguineus	13.05	40.97
Rhipicephalus sanguineus	24.58	41
Rhipicephalus sanguineus	0.52	41
Rhipicephalus sanguineus	15.07	41
Rhipicephalus sanguineus	22.95	41.03
Rhipicephalus sanguineus	20.55	41.05
Rhipicephalus sanguineus	20.43	41.08
Rhipicephalus sanguineus	9.38	41.08
Rhipicephalus sanguineus	16.48	41.12
Rhipicephalus sanguineus	16.42	41.15
Rhipicephalus sanguineus	23.45	41.15
Rhipicephalus sanguineus	22.97	41.15
Rhipicephalus sanguineus	24.15	41.15
Rhipicephalus sanguineus	-8.67	41.18
Rhipicephalus sanguineus	9.38	41.18
Rhipicephalus sanguineus	15.57	41.2
Rhipicephalus sanguineus	15.38	41.22
Rhipicephalus sanguineus	16.28	41.22
Rhipicephalus sanguineus	16.07	41.22
Rhipicephalus sanguineus	14.15	41.23
Rhipicephalus sanguineus	24.38	41.23
Rhipicephalus sanguineus	36.33	41.25
Rhipicephalus sanguineus	15.9	41.27
Rhipicephalus sanguineus	26.69	41.27
Rhipicephalus sanguineus	23.03	41.28
Rhipicephalus sanguineus	15.15	41.32
Rhipicephalus sanguineus	19.43	41.32
Rhipicephalus sanguineus	15.2	41.33
Rhipicephalus sanguineus	2.08	41.35
Rhipicephalus sanguineus	13.42	41.35
Rhipicephalus sanguineus	15.3	41.37
Rhipicephalus sanguineus	-5.27	41.38
Rhipicephalus sanguineus	15.18	41.4
Rhipicephalus sanguineus	26.25	41.42
Rhipicephalus sanguineus	19.72	41.42
Rhipicephalus sanguineus	15.12	41.43
Rhipicephalus sanguineus	15.57	41.45
Rhipicephalus sanguineus	2.25	41.45
Rhipicephalus sanguineus	15.95	41.45
Rhipicephalus sanguineus	12.87	41.47
Rhipicephalus sanguineus	13.27	41.47
Rhipicephalus sanguineus	26.52	41.5
Rhipicephalus sanguineus	15.33	41.5
Rhipicephalus sanguineus	-8	41.5
Rhipicephalus sanguineus	14.9	41.5
Rhipicephalus sanguineus	25.42	41.53
Rhipicephalus sanguineus	15.12	41.53
Rhipicephalus sanguineus	1.3	41.53
Rhipicephalus sanguineus	9.25	41.55
Rhipicephalus sanguineus	14.65	41.57
Rhipicephalus sanguineus	14.97	41.57
Rhipicephalus sanguineus	14.75	41.57
Rhipicephalus sanguineus	15.12	41.58
Rhipicephalus sanguineus	27.45	41.59
Rhipicephalus sanguineus	27.57	41.63
Rhipicephalus sanguineus	-0.88	41.63
Rhipicephalus sanguineus	15.92	41.63
Rhipicephalus sanguineus	24.17	41.65
Rhipicephalus sanguineus	15.58	41.67
Rhipicephalus sanguineus	15.38	41.68
Rhipicephalus sanguineus	15.73	41.7
Rhipicephalus sanguineus	2.17	41.7
Rhipicephalus sanguineus	14.98	41.7
Rhipicephalus sanguineus	27.62	41.7
Rhipicephalus sanguineus	8.72	41.72
Rhipicephalus sanguineus	15.63	41.72
Rhipicephalus sanguineus	15.25	41.73
Rhipicephalus sanguineus	14.73	41.77
Rhipicephalus sanguineus	-0.8	41.77
Rhipicephalus sanguineus	12.37	41.78
Rhipicephalus sanguineus	3.03	41.78
Rhipicephalus sanguineus	15.45	41.78
Rhipicephalus sanguineus	15.15	41.8
Rhipicephalus sanguineus	12.35	41.82
Rhipicephalus sanguineus	15.02	41.82
Rhipicephalus sanguineus	2.97	41.82
Rhipicephalus sanguineus	15.37	41.82
Rhipicephalus sanguineus	19.63	41.82
Rhipicephalus sanguineus	15.57	41.83
Rhipicephalus sanguineus	12.58	41.83
Rhipicephalus sanguineus	-8.28	41.85
Rhipicephalus sanguineus	2.98	41.85
Rhipicephalus sanguineus	15.35	41.87
Rhipicephalus sanguineus	8.97	41.87
Rhipicephalus sanguineus	-5.4	41.87
Rhipicephalus sanguineus	-2.83	41.88
Rhipicephalus sanguineus	16.17	41.88
Rhipicephalus sanguineus	12.42	41.9
Rhipicephalus sanguineus	2.12	41.9
Rhipicephalus sanguineus	9.08	41.92
Rhipicephalus sanguineus	8.73	41.92
Rhipicephalus sanguineus	15.03	41.95
Rhipicephalus sanguineus	27.6	41.95
Rhipicephalus sanguineus	2.75	41.97
Rhipicephalus sanguineus	27.53	41.98
Rhipicephalus sanguineus	25.95	42.01
Rhipicephalus sanguineus	-8.17	42.03
Rhipicephalus sanguineus	13.42	42.03
Rhipicephalus sanguineus	-8.2	42.05
Rhipicephalus sanguineus	19.5	42.07
Rhipicephalus sanguineus	2.92	42.07
Rhipicephalus sanguineus	2.93	42.07
Rhipicephalus sanguineus	9.5	42.08
Rhipicephalus sanguineus	3.1	42.08
Rhipicephalus sanguineus	2.98	42.08
Rhipicephalus sanguineus	2.93	42.08
Rhipicephalus sanguineus	12.17	42.1
Rhipicephalus sanguineus	3.05	42.17
Rhipicephalus sanguineus	0.9	42.17
Rhipicephalus sanguineus	27.68	42.22
Rhipicephalus sanguineus	11.1	42.25
Rhipicephalus sanguineus	11.75	42.25
Rhipicephalus sanguineus	12.68	42.27
Rhipicephalus sanguineus	11.62	42.35
Rhipicephalus sanguineus	12.1	42.42
Rhipicephalus sanguineus	24.03	42.42
Rhipicephalus sanguineus	9.52	42.45
Rhipicephalus sanguineus	11.22	42.45
Rhipicephalus sanguineus	2.8	42.48
Rhipicephalus sanguineus	27.47	42.5
Rhipicephalus sanguineus	2.78	42.52
Rhipicephalus sanguineus	2.95	42.53
Rhipicephalus sanguineus	-2.58	42.55
Rhipicephalus sanguineus	2.42	42.58
Rhipicephalus sanguineus	11.52	42.58
Rhipicephalus sanguineus	24.02	42.6
Rhipicephalus sanguineus	2.97	42.6
Rhipicephalus sanguineus	12.97	42.6
Rhipicephalus sanguineus	13.97	42.62
Rhipicephalus sanguineus	13.68	42.63
Rhipicephalus sanguineus	2.32	42.63
Rhipicephalus sanguineus	2.58	42.65
Rhipicephalus sanguineus	9.42	42.65
Rhipicephalus sanguineus	13.7	42.65
Rhipicephalus sanguineus	2.88	42.68
Rhipicephalus sanguineus	9.45	42.7
Rhipicephalus sanguineus	12.12	42.72
Rhipicephalus sanguineus	13.38	42.75
Rhipicephalus sanguineus	17.43	42.77
Rhipicephalus sanguineus	17.9	42.78
Rhipicephalus sanguineus	13.8	42.78
Rhipicephalus sanguineus	13.83	42.82
Rhipicephalus sanguineus	2.63	43
Rhipicephalus sanguineus	1.1	43.03
Rhipicephalus sanguineus	-2.83	43.1
Rhipicephalus sanguineus	6.12	43.12
Rhipicephalus sanguineus	6.35	43.12
Rhipicephalus sanguineus	6.33	43.15
Rhipicephalus sanguineus	5.85	43.17
Rhipicephalus sanguineus	6.57	43.2
Rhipicephalus sanguineus	5.8	43.2
Rhipicephalus sanguineus	2.35	43.22
Rhipicephalus sanguineus	6.07	43.23
Rhipicephalus sanguineus	26.92	43.27
Rhipicephalus sanguineus	6.63	43.27
Rhipicephalus sanguineus	-2.97	43.27
Rhipicephalus sanguineus	5.57	43.28
Rhipicephalus sanguineus	5.5	43.28
Rhipicephalus sanguineus	3.28	43.28
Rhipicephalus sanguineus	-2.98	43.3
Rhipicephalus sanguineus	5.4	43.3
Rhipicephalus sanguineus	16.22	43.32
Rhipicephalus sanguineus	6.05	43.33
Rhipicephalus sanguineus	5.98	43.33
Rhipicephalus sanguineus	5.48	43.33
Rhipicephalus sanguineus	16.67	43.33
Rhipicephalus sanguineus	5.43	43.35
Rhipicephalus sanguineus	-1.4	43.37
Rhipicephalus sanguineus	5.63	43.38
Rhipicephalus sanguineus	6.07	43.4
Rhipicephalus sanguineus	5.55	43.43
Rhipicephalus sanguineus	6.08	43.43
Rhipicephalus sanguineus	6.18	43.47
Rhipicephalus sanguineus	6.08	43.48
Rhipicephalus sanguineus	4.67	43.5
Rhipicephalus sanguineus	6.33	43.5
Rhipicephalus sanguineus	4.57	43.52
Rhipicephalus sanguineus	4.98	43.52
Rhipicephalus sanguineus	5.43	43.53
Rhipicephalus sanguineus	4.72	43.53
Rhipicephalus sanguineus	6.23	43.55
Rhipicephalus sanguineus	10.32	43.55
Rhipicephalus sanguineus	7.02	43.55
Rhipicephalus sanguineus	4.73	43.57
Rhipicephalus sanguineus	6.27	43.58
Rhipicephalus sanguineus	1.43	43.6
Rhipicephalus sanguineus	7	43.6
Rhipicephalus sanguineus	3.88	43.6
Rhipicephalus sanguineus	6.75	43.63
Rhipicephalus sanguineus	6.92	43.67
Rhipicephalus sanguineus	7.1	43.68
Rhipicephalus sanguineus	7.25	43.7
Rhipicephalus sanguineus	5.78	43.7
Rhipicephalus sanguineus	10.38	43.72
Rhipicephalus sanguineus	5.32	43.72
Rhipicephalus sanguineus	7.42	43.73
Rhipicephalus sanguineus	5.88	43.75
Rhipicephalus sanguineus	11.25	43.77
Rhipicephalus sanguineus	2.12	43.78
Rhipicephalus sanguineus	7.5	43.8
Rhipicephalus sanguineus	5.98	43.83
Rhipicephalus sanguineus	11.17	43.92
Rhipicephalus sanguineus	5	43.93
Rhipicephalus sanguineus	2.75	43.95
Rhipicephalus sanguineus	8.08	43.97
Rhipicephalus sanguineus	5.78	43.97
Rhipicephalus sanguineus	15.35	43.97
Rhipicephalus sanguineus	4.87	44
Rhipicephalus sanguineus	28	44
Rhipicephalus sanguineus	15.07	44
Rhipicephalus sanguineus	5	44.03
Rhipicephalus sanguineus	15.17	44.08
Rhipicephalus sanguineus	1.08	44.1
Rhipicephalus sanguineus	3.08	44.1
Rhipicephalus sanguineus	5.15	44.12
Rhipicephalus sanguineus	5.17	44.12
Rhipicephalus sanguineus	5.1	44.12
Rhipicephalus sanguineus	4.08	44.13
Rhipicephalus sanguineus	4.8	44.13
Rhipicephalus sanguineus	6	44.17
Rhipicephalus sanguineus	5.13	44.17
Rhipicephalus sanguineus	28.65	44.18
Rhipicephalus sanguineus	5.13	44.22
Rhipicephalus sanguineus	0.37	44.23
Rhipicephalus sanguineus	5.02	44.25
Rhipicephalus sanguineus	4.3	44.25
Rhipicephalus sanguineus	4.65	44.27
Rhipicephalus sanguineus	4.97	44.3
Rhipicephalus sanguineus	4.13	44.4
Rhipicephalus sanguineus	8.98	44.4
Rhipicephalus sanguineus	4.93	44.4
Rhipicephalus sanguineus	4.1	44.4
Rhipicephalus sanguineus	8.95	44.42
Rhipicephalus sanguineus	12.2	44.42
Rhipicephalus sanguineus	26.07	44.43
Rhipicephalus sanguineus	4.02	44.43
Rhipicephalus sanguineus	8.8	44.43
Rhipicephalus sanguineus	4.68	44.48
Rhipicephalus sanguineus	23.5	44.5
Rhipicephalus sanguineus	28.64	44.54
Rhipicephalus sanguineus	28.77	44.55
Rhipicephalus sanguineus	10.47	44.63
Rhipicephalus sanguineus	5.37	44.65
Rhipicephalus sanguineus	10.92	44.67
Rhipicephalus sanguineus	4.33	44.67
Rhipicephalus sanguineus	28.94	44.7
Rhipicephalus sanguineus	4.2	44.7
Rhipicephalus sanguineus	1.62	44.72
Rhipicephalus sanguineus	29.2	44.79
Rhipicephalus sanguineus	10.33	44.8
Rhipicephalus sanguineus	28.69	44.82
Rhipicephalus sanguineus	28.7	44.83
Rhipicephalus sanguineus	0.57	44.83
Rhipicephalus sanguineus	28.85	44.85
Rhipicephalus sanguineus	-0.47	44.85
Rhipicephalus sanguineus	29.61	44.89
Rhipicephalus sanguineus	29.59	44.9
Rhipicephalus sanguineus	25.41	44.93
Rhipicephalus sanguineus	4.73	44.95
Rhipicephalus sanguineus	1.65	44.98
Rhipicephalus sanguineus	28.94	45.02
Rhipicephalus sanguineus	23.27	45.03
Rhipicephalus sanguineus	28.8	45.18
Rhipicephalus sanguineus	2.67	45.33
Rhipicephalus sanguineus	13.53	45.42
Rhipicephalus sanguineus	13.6	45.52
Rhipicephalus sanguineus	10.98	45.57
Rhipicephalus sanguineus	5.63	45.7
Rhipicephalus sanguineus	2.9	45.73
Rhipicephalus sanguineus	4.58	45.75
Rhipicephalus sanguineus	4.13	45.77
Rhipicephalus sanguineus	21	45.83
Rhipicephalus sanguineus	13.23	46.05
Rhipicephalus sanguineus	14.52	46.05
Rhipicephalus sanguineus	21.35	46.16
Rhipicephalus sanguineus	3.42	46.47
Rhipicephalus sanguineus	2.78	46.53
Rhipicephalus sanguineus	12.28	46.58
Rhipicephalus sanguineus	23.67	46.78
Rhipicephalus sanguineus	-2	46.97
Rhipicephalus sanguineus	27.61	47.16
Rhipicephalus sanguineus	1.18	47.27
Rhipicephalus sanguineus	27.38	47.35
Rhipicephalus sanguineus	19.61	47.99
Rhipicephalus sanguineus	7.45	48.4
Rhipicephalus sanguineus	2.6	48.45
Rhipicephalus sanguineus	7.5	48.5
Rhipicephalus sanguineus	5.83	48.62
Rhipicephalus sanguineus	2.32	48.78
Rhipicephalus sanguineus	2.47	48.78
Rhipicephalus sanguineus	2.48	48.8
Rhipicephalus sanguineus	2.13	48.8
Rhipicephalus sanguineus	2.47	48.82
Rhipicephalus sanguineus	2.33	48.87
Rhipicephalus sanguineus	2.47	48.9
Rhipicephalus sanguineus	3.95	49.05
Rhipicephalus sanguineus	4.17	49.37
Rhipicephalus sanguineus	5.38	49.92
Rhipicephalus sanguineus	4.86	50.42
Rhipicephalus sanguineus	5.79	50.59
Rhipicephalus sanguineus	6.03	50.71
Rhipicephalus sanguineus	4.4	50.71
Rhipicephalus sanguineus	4.47	50.77
Rhipicephalus sanguineus	4.32	50.78
Rhipicephalus sanguineus	4.34	50.8
Rhipicephalus sanguineus	4.26	50.85
Rhipicephalus sanguineus	4.35	50.85
Rhipicephalus sanguineus	4.99	50.95
Rhipicephalus sanguineus	5.02	50.95
Rhipicephalus sanguineus	3.46	51.15
Rhipicephalus sanguineus	4.49	51.28
Rhipicephalus sanguineus	4.76	51.35
